# Supplementary material for: Soil microbial diversity in organic and non-organic pasture systems
Source: PeerJ. 2021 Apr 22;9:e11184. doi: 10.7717/peerj.11184 (PMC8071071; doi:10.7717/peerj.11184)
Supplement: Supplemental Information 1 [file peerj-09-11184-s001.xlsx]

## Sheet: Sheet1
SN	Year	Plot#	Rep#	Trt	Sampling date#	pH	Soil N	Soil C	Soil C/N ratio	Al SM (mg/L)	As SM (mg/L)	B SM (mg/L)	Ca SM (mg/L)	Cd SM (mg/L)	Co SM (mg/L)	Cr SM (mg/L)	Cu SM (mg/L)	Fe SM (mg/L)	K SM (mg/L)	Mg SM (mg/L)	Mn SM (mg/L)	Mo SM (mg/L)	Na SM (mg/L)	Ni SM (mg/L)	P SM (mg/L)	Pb SM (mg/L)	S SM (mg/L)	Se SM (mg/L)	Ti SM (mg/L)	Zn SM (mg/L)	Al SM (mg/kg)	As SM (mg/kg)	B SM (mg/kg)	Ca SM (mg/kg)	Cd SM (mg/kg)	Co SM (mg/kg)	Cr SM (mg/kg)	Cu SM (mg/kg)	Fe SM (mg/kg)	K SM (mg/kg)	Mg SM (mg/kg)	Mn SM (mg/kg)	Mo SM (mg/kg)	Na SM (mg/kg)	Ni SM (mg/kg)	P SM (mg/kg)	Pb SM (mg/kg)	S SM (mg/kg)	Se SM (mg/kg)
1	2017	SRC 2W	1	Conventional	2017-07-07	7.46	0.142676	1.39067	9.74702	32.2	0.013	3.08	158	0.004	0.114	0.009	0.078	17.3	10.1	6.51	19.6	0.001	10.3	0.05	2.86	0.276	0.976	0.008	0.045	0.154	322	0.13	30.8	1580	0.04	1.14	0.09	0.78	173	101	65.1	196	0.01	103	0.5	28.6	2.76	9.76	0.08
2	2017	SRC 2E	2	Conventional	2017-07-07	7.345	0.15538	1.29427	8.32974	34.7	0.014	3.02	142	0.004	0.119	0.009	0.065	16.4	9.52	5.68	18.9	0.001	11.8	0.048	2.82	0.277	0.82	0.008	0.034	0.117	347	0.14	30.2	1420	0.04	1.19	0.09	0.65	164	95.2	56.8	189	0.01	118	0.48	28.2	2.77	8.2	0.08
3	2017	SRC 2W	1	Conventional	2017-08-03	7.28	0.162982	1.55501	9.54103	31.8	0.013	3.02	148	0.004	0.12	0.009	0.092	16.1	11.5	5.93	19.4	0.001	10.2	0.047	2.94	0.287	1.15	0.006	0.037	0.163	318	0.13	30.2	1480	0.04	1.2	0.09	0.92	161	115	59.3	194	0.01	102	0.47	29.4	2.87	11.5	0.06
4	2017	SRC 2E	2	Conventional	2017-08-03	7.41	0.159326	1.61005	10.1054	30	0.013	3.08	149	0.004	0.108	0.009	0.08	17.2	11.4	6.47	17.9	0.001	11.3	0.047	3.55	0.274	1.15	0.003	0.037	0.198	300	0.13	30.8	1490	0.04	1.08	0.09	0.8	172	114	64.7	179	0.01	113	0.47	35.5	2.74	11.5	0.03
5	2017	SRC 3W	1	Conventional	2017-07-07	6.785	0.111439	1.19656	10.7373	35	0.011	3.14	98.1	0.004	0.153	0.009	0.068	19.2	8.56	5.37	22.1	0.001	10.2	0.063	2.66	0.256	0.833	0.01	0.044	0.133	350	0.11	31.4	981	0.04	1.53	0.09	0.68	192	85.6	53.7	221	0.01	102	0.63	26.6	2.56	8.33	0.1
6	2017	SRC 3E	2	Conventional	2017-07-07	6.135	0.162202	1.45107	8.94607	36.6	0.009	3.02	84	0.004	0.121	0.008	0.057	15.9	8.11	5.55	18.2	0.001	9.81	0.06	2.25	0.248	0.997	0.007	0.045	0.113	366	0.09	30.2	840	0.04	1.21	0.08	0.57	159	81.1	55.5	182	0.01	98.1	0.6	22.5	2.48	9.97	0.07
7	2017	SRC 3W	1	Conventional	2017-08-03	6.41	0.144271	1.19481	8.28171	27.3	0.01	3.23	86.2	0.003	0.11	0.006	0.056	9.86	8.73	5.12	14.6	0.002	9.62	0.038	1.95	0.202	0.818	0.006	0.039	0.108	273	0.1	32.3	862	0.03	1.1	0.06	0.56	98.6	87.3	51.2	146	0.02	96.2	0.38	19.5	2.02	8.18	0.06
8	2017	SRC 3E	2	Conventional	2017-08-03	6.04	0.154881	1.43533	9.26728	39.4	0.008	3.07	79.3	0.004	0.115	0.01	0.057	18.1	10.9	6.1	18	0.001	9.52	0.063	2.43	0.237	1.06	0.006	0.075	0.126	394	0.08	30.7	793	0.04	1.15	0.1	0.57	181	109	61	180	0.01	95.2	0.63	24.3	2.37	10.6	0.06
9	2017	P12W6	1	Organic	2017-07-07	5.89	0.238109	2.36736	9.94236	42.3	0.007	3.24	106	0.004	0.286	0.006	0.105	15.1	13.4	12.9	20.6	0.001	10.6	0.071	1.96	0.306	1.21	0.009	0.037	0.273	423	0.07	32.4	1060	0.04	2.86	0.06	1.05	151	134	129	206	0.01	106	0.71	19.6	3.06	12.1	0.09
10	2017	P12W6	2	Organic	2017-07-07	5.985	0.231545	2.09425	9.04466	44.6	0.01	3.24	108	0.004	0.294	0.007	0.107	16	13.6	13	20.2	0.001	10.5	0.075	1.94	0.315	1.2	0.007	0.048	0.309	446	0.1	32.4	1080	0.04	2.94	0.07	1.07	160	136	130	202	0.01	105	0.75	19.4	3.15	12	0.07
11	2017	P12W6	1	Organic	2017-08-03	5.8	0.322088	3.31154	10.2815	41.3	0.009	3.28	127	0.005	0.23	0.005	0.192	19.5	18.3	17.1	18.1	0.002	10.9	0.08	4.86	0.329	1.71	0.012	0.032	0.511	413	0.09	32.8	1270	0.05	2.3	0.05	1.92	195	183	171	181	0.02	109	0.8	48.6	3.29	17.1	0.12
12	2017	P12W6	2	Organic	2017-08-03	5.795	0.324034	3.16797	9.77665	41.7	0.014	3.27	117	0.005	0.215	0.006	0.168	19.6	18.5	16.5	17.5	0.001	10.7	0.077	4.29	0.328	1.66	0.012	0.032	0.473	417	0.14	32.7	1170	0.05	2.15	0.06	1.68	196	185	165	175	0.01	107	0.77	42.9	3.28	16.6	0.12
13	2017	P13	1	Organic	2017-07-07	5.54	0.197441	1.85575	9.39899	52.9	0.006	3.15	72.5	0.003	0.228	0.007	0.07	14.4	14.5	12.5	18.8	0.001	12.2	0.076	1.16	0.244	1.2	0.008	0.04	0.304	529	0.06	31.5	725	0.03	2.28	0.07	0.7	144	145	125	188	0.01	122	0.76	11.6	2.44	12	0.08
14	2017	P13	2	Organic	2017-07-07	5.585	0.178251	1.47599	8.28039	53.5	0.008	3.13	72.1	0.003	0.211	0.006	0.073	14.2	15.8	13.1	17.7	0.001	12.4	0.075	1.12	0.244	1.2	0.008	0.039	0.305	535	0.08	31.3	721	0.03	2.11	0.06	0.73	142	158	131	177	0.01	124	0.75	11.2	2.44	12	0.08
15	2017	P13	1	Organic	2017-08-03	4.905	0.249906	2.19783	8.79463	50.6	0.006	3.23	83.5	0.004	0.178	0.006	0.064	16.1	12.4	13.4	14.5	0.001	10.8	0.063	1.56	0.263	1.33	0	0.045	0.183	506	0.06	32.3	835	0.04	1.78	0.06	0.64	161	124	134	145	0.01	108	0.63	15.6	2.63	13.3	0
16	2017	P13	2	Organic	2017-08-03	5.59	0.232584	2.4816	10.6697	53.8	0.01	3.22	86.8	0.004	0.19	0.006	0.062	17.5	12.9	14.2	15.2	0.001	11	0.069	1.56	0.276	1.36	0.008	0.044	0.221	538	0.1	32.2	868	0.04	1.9	0.06	0.62	175	129	142	152	0.01	110	0.69	15.6	2.76	13.6	0.08
17	2018	SRC 2W	1	Conventional	2018-07-03	7.255	0.14108	1.2423	8.80564	28.5	0.009	3.16	117	0.004	0.114	0.008	0.077	12.7	8.72	5.21	16.1	0.002	10.7	0.038	1.65	0.25	0.727	0.003	0.045	0.364	285	0.09	31.6	1170	0.04	1.14	0.08	0.77	127	87.2	52.1	161	0.02	107	0.38	16.5	2.5	7.27	0.03
18	2018	SRC 2E	2	Conventional	2018-07-03	7.155	0.128885	1.20509	9.35013	32.5	0.012	3.13	115	0.004	0.118	0.009	0.064	12.8	10.8	5.47	16.1	0.001	11.1	0.038	2.1	0.254	0.791	0.007	0.04	0.211	325	0.12	31.3	1150	0.04	1.18	0.09	0.64	128	108	54.7	161	0.01	111	0.38	21	2.54	7.91	0.07
19	2018	SRC 2W	1	Conventional	2018-08-03	7.365	0.129114	1.18379	9.16856	31.2	0.012	3.08	119	0.003	0.104	0.009	0.06	12.4	7.3	5	15.2	0.001	10.2	0.04	1.91	0.241	0.699	0	0.053	0.137	312	0.12	30.8	1190	0.03	1.04	0.09	0.6	124	73	50	152	0.01	102	0.4	19.1	2.41	6.99	0
20	2018	SRC 2E	2	Conventional	2018-08-03	7	0.119209	1.0032	8.41546	38	0.01	3.07	115	0.003	0.11	0.007	0.054	11.4	7.81	5.77	13.9	0.001	12.3	0.031	1.72	0.249	0.776	0	0.035	0.1	380	0.1	30.7	1150	0.03	1.1	0.07	0.54	114	78.1	57.7	139	0.01	123	0.31	17.2	2.49	7.76	0
21	2018	SRC 3W	1	Conventional	2018-07-03	6.675	0.116637	1.20482	10.3297	34.4	0.012	3.14	89.1	0.004	0.145	0.009	0.066	13.6	8.72	5.17	19.3	0.002	10.5	0.054	2.04	0.255	0.752	0.008	0.037	0.357	344	0.12	31.4	891	0.04	1.45	0.09	0.66	136	87.2	51.7	193	0.02	105	0.54	20.4	2.55	7.52	0.08
22	2018	SRC 3E	2	Conventional	2018-07-03	6.015	0.150886	1.20685	7.99842	36.4	0.01	3.06	72.4	0.004	0.119	0.008	0.055	13.2	10	5.67	16.8	0.001	9.58	0.045	1.77	0.234	0.862	0	0.04	0.165	364	0.1	30.6	724	0.04	1.19	0.08	0.55	132	100	56.7	168	0.01	95.8	0.45	17.7	2.34	8.62	0
23	2018	SRC 3W	1	Conventional	2018-08-03	6.605	0.124293	1.09927	8.84419	34.6	0.011	3.18	85.1	0.003	0.153	0.006	0.057	10.6	9.15	5	19.6	0.001	10.1	0.05	1.68	0.249	0.651	0.007	0.037	0.143	346	0.11	31.8	851	0.03	1.53	0.06	0.57	106	91.5	50	196	0.01	101	0.5	16.8	2.49	6.51	0.07
24	2018	SRC 3E	2	Conventional	2018-08-03	5.855	0.139142	1.18638	8.52639	34.7	0.007	3.07	65.5	0.004	0.108	0.006	0.051	12.4	9.94	5.47	17.7	0.001	10	0.063	1.85	0.229	0.953	0.007	0.04	0.209	347	0.07	30.7	655	0.04	1.08	0.06	0.51	124	99.4	54.7	177	0.01	100	0.63	18.5	2.29	9.53	0.07
25	2018	P12W6	1	Organic	2018-07-03	5.825	0.196416	1.80221	9.17548	43.9	0.01	3.29	98	0.003	0.325	0.005	0.109	12.4	14.5	12.3	18.9	0.001	11	0.054	2.06	0.293	1.17	0.007	0.032	0.5	439	0.1	32.9	980	0.03	3.25	0.05	1.09	124	145	123	189	0.01	110	0.54	20.6	2.93	11.7	0.07
26	2018	P12W6	2	Organic	2018-07-03	5.825	0.205469	1.70769	8.31118	43.6	0.009	3.34	98.5	0.003	0.324	0.005	0.116	12.2	14.5	12.1	16.6	0.002	11.3	0.055	2.86	0.281	1.2	0.006	0.032	0.509	436	0.09	33.4	985	0.03	3.24	0.05	1.16	122	145	121	166	0.02	113	0.55	28.6	2.81	12	0.06
27	2018	P12W6	1	Organic	2018-08-03	6.035	0.206692	1.97633	9.5617	43.9	0.011	3.31	110	0.003	0.277	0.005	0.109	10.4	17.3	13.5	16.2	0.003	10.5	0.056	2.25	0.275	1.15	0.013	0.035	0.275	439	0.11	33.1	1100	0.03	2.77	0.05	1.09	104	173	135	162	0.03	105	0.56	22.5	2.75	11.5	0.13
28	2018	P12W6	2	Organic	2018-08-03	5.47	0.231752	2.27044	9.79688	44.5	0.009	3.3	114	0.004	0.253	0.005	0.132	10.3	18.4	14	16.3	0.001	10.8	0.06	2.44	0.26	1.21	0.014	0.039	0.339	445	0.09	33	1140	0.04	2.53	0.05	1.32	103	184	140	163	0.01	108	0.6	24.4	2.6	12.1	0.14
29	2018	P13	1	Organic	2018-07-03	5.53	0.182477	1.51445	8.29938	43.9	0.005	3.19	58.7	0.003	0.197	0.012	0.052	11.4	14.2	11.8	18	0.002	10.9	0.06	0.967	0.215	1.04	0.005	0.042	0.193	439	0.05	31.9	587	0.03	1.97	0.12	0.52	114	142	118	180	0.02	109	0.6	9.7	2.15	10.4	0.05
30	2018	P13	2	Organic	2018-07-03	5.47	0.166755	1.47283	8.83234	44.6	0.007	3.15	59.6	0.003	0.181	0.004	0.052	11.5	14.1	12	16.8	0.001	10.9	0.055	1.03	0.215	1.01	0.006	0.041	0.198	446	0.07	31.5	596	0.03	1.81	0.04	0.52	115	141	120	168	0.01	109	0.55	10.3	2.15	10.1	0.06
31	2018	P13	1	Organic	2018-08-03	5.445	0.187203	1.52214	8.13098	44.4	0.009	3.19	58.4	0.003	0.175	0.007	0.057	12.8	12	12	16.8	0.001	10.9	0.065	1.14	0.233	1.03	0.006	0.046	0.171	444	0.09	31.9	584	0.03	1.75	0.07	0.57	128	120	120	168	0.01	109	0.65	11.4	2.33	10.3	0.06
32	2018	P13	2	Organic	2018-08-03	5.46	0.177853	1.60177	9.00614	44.3	0.006	3.16	56.9	0.004	0.164	0.005	0.057	12.3	12	12	14.8	0.001	10.9	0.062	1.1	0.221	1.07	0.009	0.053	0.179	443	0.06	31.6	569	0.04	1.64	0.05	0.57	123	120	120	148	0.01	109	0.62	11	2.21	10.7	0.09
[truncated: 2 more columns]
